# Supplementary material for: Downscaled climate change scenarios for Central America
Source: Copernicus journal article supplement (doi:10.5194/asr-19-105-2022), 2022-10-10
Supplement: Supplementary file 1 [file asr-19-105-2022-supplement.zip]

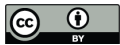

## *Supplement of*

## **Downscaled climate change scenarios for Central America**

**Jorge Tamayo et al.**

*Correspondence to:* Jorge Tamayo (jtamayoc@aemet.es)

- asr-19-105-2022-supplement-title-page.pdf
- pcpr\_ana\_rcp45.png
- pcpr\_cordex\_rcp45.png
- pr\_p\_01\_12\_rcp45\_cordex.png
- precip\_p\_01\_12\_RCP45\_ana.png
- tasmax\_T\_01\_12\_RCP45\_ana.png
- tasmax\_T\_01\_12\_RCP45\_reg.png
- tasmax\_T\_01\_12\_rcp45\_cordex.png
- tasmin\_t\_01\_12\_RCP45\_ana.png
- tasmin\_t\_01\_12\_RCP45\_reg.png
- tasmin\_t\_01\_12\_rcp45\_cordex.png
- tmax\_ana\_rcp45.png
- tmax\_cordex\_rcp45.png
- tmax\_reg\_rcp45.png
- tmin\_ana\_rcp45.png
- tmin\_cordex\_rcp45.png
- tmin\_reg\_rcp45.png

The copyright of individual parts of the supplement might differ from the article licence.
